# Supplementary material for: Comparison and Significance of Contrast-Enhanced Computed Tomographic Findings of Large-Vessel Vasculitis Before and After Treatment: Differences Between Takayasu Arteritis and Giant Cell Arteritis
Source: PubMed Central journal article supplement — Eur J Rheumatol. 2024 Jul 1;11(3):371–7. doi: 10.5152/eurjrheum.2024.24056 (PMC11562625; doi:10.5152/eurjrheum.2024.24056), 2024-07-01
Supplement: supplementary_material.pdf [file supplementary_material.pdf]

**Supplementary Table 1.** Changes in Combined Arteritis Damage Scores Before and After Treatment for the 21 Vessels

|               | CARDS before treatment,<br>median (IQR) | CARDS after treatment,<br>median (IQR) | p value |
|---------------|-----------------------------------------|----------------------------------------|---------|
| Total, n = 51 | 0 (0-1.6)                               | 0.6 (0-1.6)                            | 0.443   |
| TAK, n = 24   | 1.2 (0.3-1.9)                           | 1.2 (0-2.2)                            | 0.815   |
| GCA, n = 27   | 0 (0-0.3)                               | 0 (0-1.2)                              | 0.327   |

CARDS, Combined Arteritis Damage Score; IQR, interquartile range; TAK, Takayasu arteritis; GCA, giant cell arteritis. Data are analyzed using the Mann-Whitney *U*-test. CARDS is computed as follows: (number of vessels with <50% stenosis × 0.6) + (number of vessels with ≥50% stenosis × 1.2) + (number of vessels with occlusion × 1.6) + (number of vessels with dilatation or aneurysm × 0.8).

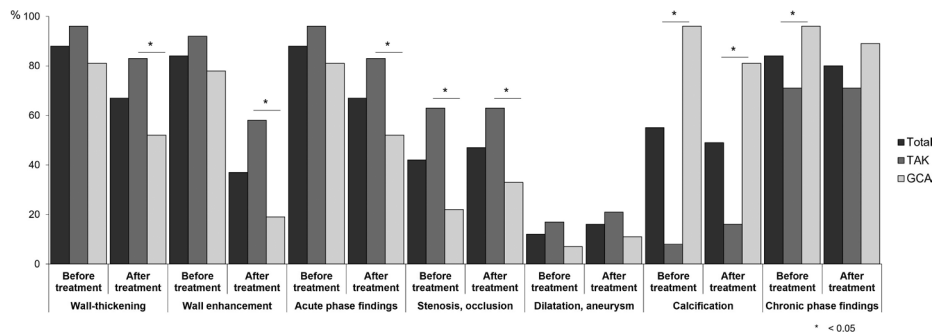

**Supplementary Figure 1.** Prevalence of vascular lesions in the TAK and GCA groups before and after treatment. The frequencies of wall thickening, wall contrast enhancement, stenosis, occlusion, dilatation, aneurysm, and calcification at any vessels in the TAK and GCA groups before and after treatment are shown. TAK, Takayasu arteritis; GCA, giant cell arteritis. Data are analyzed using the chi-square and Fisher's exact tests. Acute-phase findings include a combination of wall thickening and contrast enhancement of the vascular wall. Chronic-phase findings include a combination of stenosis, occlusion, dilatation, aneurysm, and calcification. The *P* values are calculated for the differences between the TAK and GCA groups.
